# Supplementary material for: Challenges and Suggestions in Management of Lung and Liver Cancer in Uzbekistan: The Second Report of the Uzbekistan–Korea Oncology Consortium
Source: Int J Environ Res Public Health. 2022 Sep 17;19(18):11727. doi: 10.3390/ijerph191811727 (PMC9517504; doi:10.3390/ijerph191811727)
Supplement: Supplementary file 1 [file ijerph-19-11727-s001.zip › ijerph-1894971-supplementary.pdf]

Supplement Table S1. Suggested subjects for further research

| Disease      | Subject                 | Topic                                                                                                                     | Recommended Methodology                                   |
|--------------|-------------------------|---------------------------------------------------------------------------------------------------------------------------|-----------------------------------------------------------|
| Lung cancer  | Prevention and etiology | Cause of lung cancer in Uzbekistan                                                                                        | Cohort or case-control study<br>Questionnaire-based study |
|              |                         | Non-smoking cancer cause in Uzbekistan (e.g. occupational exposure: wood dust, diesel exhaust, mining dust, cooking fume) |                                                           |
|              |                         | Investigating efficacy and feasibility of chest CT screening                                                              | Governance study<br>Systematic review                     |
|              | Treatment               | Thoracic surgeon training program                                                                                         | Delphi study<br>Systematic review                         |
|              |                         | Standardized protocol of pathologic specimen preparation and reporting (including immunohistochemistry)                   |                                                           |
|              |                         | Optimizing Cobalt-60 plan for lung cancer                                                                                 | Case-series study<br>Translational research               |
|              |                         | Investigating effect and feasibility of novel systemic treatment                                                          | Governance research                                       |
|              |                         |                                                                                                                           |                                                           |
| Liver Cancer | Prevention and etiology | Cause of liver cancer in Uzbekistan                                                                                       | Cohort or case-control study<br>Questionnaire-based study |
|              |                         | Nationwide effect of hepatitis B virus vaccination                                                                        |                                                           |
|              |                         | Route of hepatitis C infectoin in Uzbekistan                                                                              | Case-control study<br>Questionnaire-based study           |
|              |                         | Investigating efficacy and feasibility of liver cancer screening (e.g. sonography or alphafeto protein measurement)       | Governance study<br>Systematic review                     |
|              | Treatment               | Investigating effect and feasibility of systemic treatment (e.g. sorafenib, anti-viral agents)                            | Governance research<br>Systematic review                  |
|              |                         | Investigating effect and feasibility intervention radiology                                                               |                                                           |
|              |                         | Use of external radiotherapy on locally advanced HCC                                                                      | Case-series study<br>Translational research               |
